# Supplementary material for: Anti-glycation, Carbonyl Trapping and Anti-inflammatory Activities of Chrysin Derivatives
Source: PubMed Central journal article supplement (PMC6099615; doi:10.3390/molecules23071752), 2018-07-17
Supplement: molecules-23-01752-s001.pdf [file molecules-23-01752-s001.pdf]

**Table S1.** <sup>1</sup>H & <sup>13</sup>C NMR spectra of chrysin derivatives.

| Carbon                   | 7-O-Acetylchrysin                |                                   | 5,7-Di-O-acetylchrysin           |                                   | 7-O-Methoxychrysin               |                                   | 5,7-Di-O-methoxychrysin          |                                   | 7-O-Prenylchrysin                |                                   |
|--------------------------|----------------------------------|-----------------------------------|----------------------------------|-----------------------------------|----------------------------------|-----------------------------------|----------------------------------|-----------------------------------|----------------------------------|-----------------------------------|
|                          | <sup>1</sup> H (δ <sub>H</sub> ) | <sup>13</sup> C (δ <sub>C</sub> ) | <sup>1</sup> H (δ <sub>H</sub> ) | <sup>13</sup> C (δ <sub>C</sub> ) | <sup>1</sup> H (δ <sub>H</sub> ) | <sup>13</sup> C (δ <sub>C</sub> ) | <sup>1</sup> H (δ <sub>H</sub> ) | <sup>13</sup> C (δ <sub>C</sub> ) | <sup>1</sup> H (δ <sub>H</sub> ) | <sup>13</sup> C (δ <sub>C</sub> ) |
| 2                        | -                                | 163.9                             | -                                | 163.7                             | -                                | 162.8                             | -                                | 165.4                             | -                                | 163.9                             |
| 3                        | 7.17<br>(1H, s)                  | 104.7                             | 6.93<br>(1H, s)                  | 104.6                             | 7.04<br>(1H, s)                  | 104.9                             | 6.78<br>(1H, s)                  | 104.8                             | 6.97<br>(1H, s)                  | 104.3                             |
| 4                        | -                                | 182.3                             | -                                | 176.3                             | -                                | 181.7                             | -                                | 177.6                             | -                                | 181.0                             |
| 5                        | -                                | 160.5                             | -                                | 152.3                             | -                                | 161.1                             | -                                | 163.1                             | -                                | 161.7                             |
| 6                        | 6.69<br>(1H, d,<br>2.00)         | 106.4                             | 7.64-7.57<br>(1H, m)             | 115.4                             | 6.41<br>(1H, d,<br>2.24)         | 99.1                              | 6.52<br>(1H, d,<br>2.26)         | 96.1                              | 6.23<br>(1H, d,<br>2.07)         | 98.1                              |
| 7                        | -                                | 157.1                             | -                                | 158.6                             | -                                | 168.9                             | -                                | 166.8                             | -                                | 164.3                             |
| 8                        | 7.13<br>(1H, d,<br>2.00)         | 103.8                             | 7.10<br>(1H, d,<br>2.34)         | 108.6                             | 6.82<br>(1H, d,<br>2.32)         | 93.3                              | 6.88<br>(1H, d,<br>2.21)         | 92.9                              | 6.53<br>(1H, d,<br>2.08)         | 93.4                              |
| 9                        | -                                | 156.5                             | -                                | 156.9                             | -                                | 158.3                             | -                                | 158.9                             | -                                | 158.9                             |
| 10                       | -                                | 108.4                             | -                                | 116.3                             | -                                | 104.2                             | -                                | 107.8                             | -                                | 104.2                             |
| 1'                       | -                                | 130.9                             | -                                | 131.4                             | -                                | 132.1                             | -                                | 133.1                             | -                                | 130.3                             |
| 2'                       | 8.14-8.12<br>(1H, m)             | 126.3                             | 8.10-8.07<br>(1H, m)             | 127.2                             | 8.11-8.09<br>(1H, m)             | 128.6                             | 8.06-8.03<br>(1H, m)             | 128.2                             | 8.08-8.06<br>(1H, m)             | 125.9                             |
| 3'                       | -                                | 128.6                             | -                                | 128.4                             | -                                | 129.3                             | -                                | 128.9                             | -                                | 127.3                             |
| 4'                       | 7.65-7.58<br>(3H, m)             | 127.7                             | 7.64-7.57<br>(3H, m)             | 127.3                             | 7.63-7.57<br>(3H, m)             | 130.1                             | 7.59-7.54<br>(3H, m)             | 130.4                             | 7.62-7.55<br>(3H, m)             | 129.1                             |
| 5'                       | -                                | 128.6                             | -                                | 128.3                             | -                                | 129.3                             | -                                | 128.9                             | -                                | 127.3                             |
| 6'                       | 8.14-8.12<br>(1H, m)             | 126.3                             | 8.10-8.07<br>(1H, m)             | 127.2                             | 8.11-8.09<br>(1H, m)             | 128.6                             | 8.06-8.03<br>(1H, m)             | 128.2                             | 8.08-8.06<br>(1H, m)             | 125.9                             |
| 5-Methoxy                | -                                | -                                 | -                                | -                                 | -                                | -                                 | 3.90<br>(3H, s)                  | 56.3                              | -                                | -                                 |
| 7-Methoxy                | -                                | -                                 | -                                | -                                 | 3.88<br>(3H, s)                  | 56.1                              | 3.84<br>(3H, s)                  | 56.3                              | -                                | -                                 |
| 5-Acetyl                 | -                                | -                                 | -                                | 169.5                             | -                                | -                                 | -                                | -                                 | -                                | -                                 |
| 5-Acetyl-CH <sub>3</sub> | -                                | -                                 | 2.17<br>(3H, s)                  | 21.1                              | -                                | -                                 | -                                | -                                 | -                                | -                                 |

|                          |                 |       |                 |       |   |   |   |   |                          |            |
|--------------------------|-----------------|-------|-----------------|-------|---|---|---|---|--------------------------|------------|
| 7-Acetyl                 | -               | 169.4 | -               | 169.5 | - | - | - | - | -                        | -          |
| 7-Acetyl-CH <sub>3</sub> | 2.32<br>(3H, s) | 21.4  | 2.17<br>(3H, s) | 21.3  | - | - | - | - | -                        | -          |
| 7-Prenyl-1'              | -               | -     | -               | -     | - | - | - | - | 4.58<br>(2H, d,<br>6.60) | 65.0       |
| 7-Prenyl-2'              | -               | -     | -               | -     | - | - | - | - | 5.49<br>(1H, br,<br>s)   | 118.7      |
| 7-Prenyl-3'              | -               | -     | -               | -     | - | - | - | - | -                        | 138.2      |
| 7-Prenyl-CH <sub>3</sub> | -               | -     | -               | -     | - | - | - | - | 1.77, 1.82<br>(6H, s)    | 18.3, 25.2 |

---
